# Supplementary material
Source: PubMed Central journal article supplement (PMC5502749)
Supplement: NIHMS864929-supplement-supplement_1.pdf [file NIHMS864929-supplement-supplement_1.pdf]

## Supplemental Table

|                                       | <b>Low SHFM,<br/>Low SPRM<br/>(N=24710)</b> | <b>High SHFM,<br/>Low SPRM<br/>(N=24711)</b> | <b>Low SHFM,<br/>High SPRM<br/>(N=24713)</b> | <b>High SHFM,<br/>High SPRM<br/>(N=24712)</b> |
|---------------------------------------|---------------------------------------------|----------------------------------------------|----------------------------------------------|-----------------------------------------------|
| <b>Demographics</b>                   |                                             |                                              |                                              |                                               |
| Age: Mean (SD)                        | 66.7 (8.9)                                  | 75.0 (7.9)                                   | 53.1 (10.1)                                  | 66.7 (9.5)                                    |
| Female: No. (%)                       | 9449 (38.2)                                 | 8135 (32.9)                                  | 3601 (14.6)                                  | 2441 (9.9)                                    |
| <b>History and Risk Factors</b>       |                                             |                                              |                                              |                                               |
| NYHA Functional Classification        |                                             |                                              |                                              |                                               |
| Class I: No. (%)                      | 3805 (15.4)                                 | 775 (3.1)                                    | 3091 (12.5)                                  | 661 (2.7)                                     |
| Class II: No. (%)                     | 16499 (66.8)                                | 10391 (42.1)                                 | 17958 (72.7)                                 | 13562 (54.9)                                  |
| Class III: No. (%)                    | 4406 (17.8)                                 | 13545 (54.8)                                 | 3664 (14.8)                                  | 10489 (42.4)                                  |
| Ischemic Etiology:<br>No. (%)         | 14958 (60.5)                                | 18761 (75.9)                                 | 15383 (62.2)                                 | 20119 (81.4)                                  |
| Lung Disease: No. (%)                 | 3138 (12.7)                                 | 5716 (23.1)                                  | 3245 (13.1)                                  | 6603 (26.7)                                   |
| Diabetes Mellitus:<br>No. (%)         | 8794 (35.6)                                 | 12947 (52.4)                                 | 4218 (17.1)                                  | 8339 (33.7)                                   |
| <b>Diagnostic Testing</b>             |                                             |                                              |                                              |                                               |
| LVEF: Mean (SD)                       | 27.9 (5.1)                                  | 26.5 (5.8)                                   | 25.1 (6.0)                                   | 23.5 (6.5)                                    |
| Creatinine: Mean (SD)                 | 1.1 (0.3)                                   | 1.5 (0.5)                                    | 1.0 (0.2)                                    | 1.2 (0.3)                                     |
| Sodium: Mean (SD)                     | 139.5 (2.8)                                 | 138.5 (3.7)                                  | 139.3 (2.6)                                  | 138.9 (3.1)                                   |
| Systolic Blood Pressure:<br>Mean (SD) | 136.0 (22.8)                                | 130.7 (25.9)                                 | 129.3 (17.2)                                 | 126.2 (18.7)                                  |
| QRS duration (ms):<br>Mean (SD)       | 108.0 (23.2)                                | 114.2 (25.3)                                 | 106.5 (21.0)                                 | 113.6 (23.4)                                  |
| <b>Medications</b>                    |                                             |                                              |                                              |                                               |
| ACEI or ARB: No. (%)                  | 22409 (90.7)                                | 18665 (75.5)                                 | 22029 (89.1)                                 | 19350 (78.3)                                  |
| Beta Blocker: No. (%)                 | 23241 (94.1)                                | 19967 (80.8)                                 | 22763 (92.1)                                 | 18613 (75.3)                                  |
| Digoxin: No. (%)                      | 2280 (9.2)                                  | 5407 (21.9)                                  | 6480 (26.2)                                  | 11804 (47.8)                                  |
| Diuretic: No. (%)                     | 11481 (46.5)                                | 19269 (78.0)                                 | 13166 (53.3)                                 | 20113 (81.4)                                  |
| <b>Outcomes and Models</b>            |                                             |                                              |                                              |                                               |
| Death: No. (%)                        | 2906 (11.8)                                 | 8944 (36.2)                                  | 2087 (8.4)                                   | 6293 (25.5)                                   |
| SPRM % Sudden Death:<br>Mean (SD)     | 49.0 (6.1)                                  | 35.8 (6.3)                                   | 65.0 (5.7)                                   | 52.6 (5.9)                                    |
| SHFM annual mortality:<br>Mean (SD)   | 4.0 (1.0)                                   | 13.4 (7.8)                                   | 3.1 (1.2)                                    | 9.2 (1.0)                                     |

\*All P-values < 0.001.
